# Supplementary material for: Using dopamine interlayers to construct Fe/Fe3C@FeNC microspheres of high N-content for bifunctional oxygen electrocatalysts of Zn–air batteries
Source: Royal Society of Chemistry journal article supplement (doi:10.1039/d2dt03522g), 2023-01-01
Supplement: d2dt03522g1.pdf [file d2dt03522g1.pdf]

## Supplementary Material

### Experimental Details

#### 1. Synthesis of g-C<sub>3</sub>N<sub>4</sub>

For a typical run, 5 g melamine was transferred into a quartz boat and kept in air tube furnace at 550 °C for 4 h at a heating rate of 6 °C·min [1].

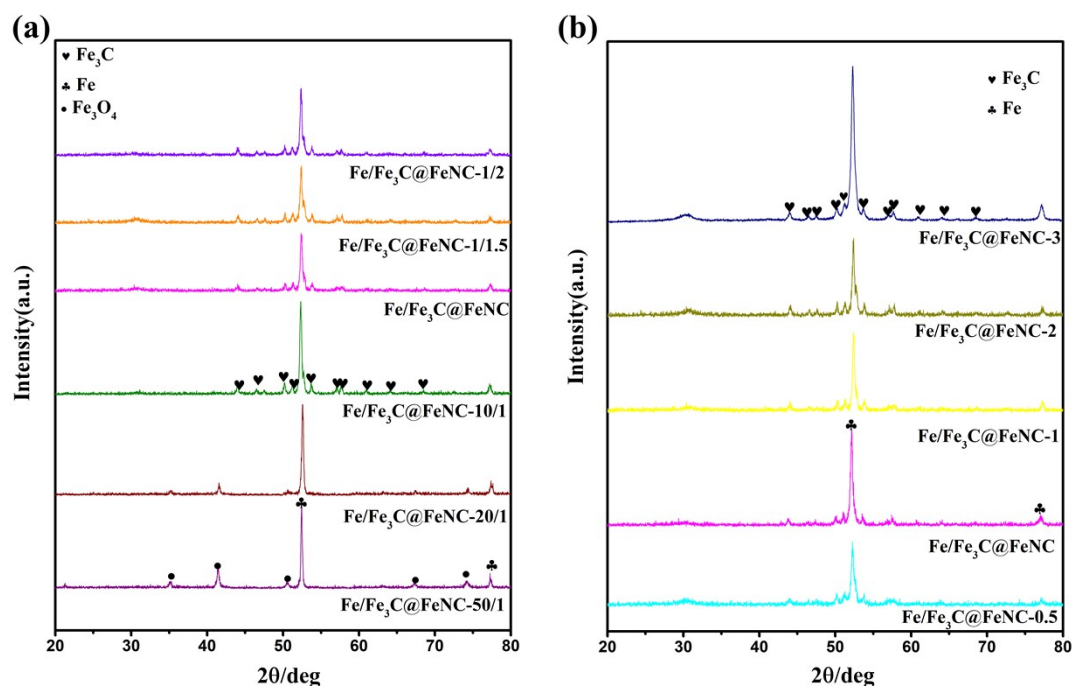

Fig. S1. (a) XRD patterns of the Fe-N-C samples prepared by different mass ratios of Fe<sub>2</sub>O<sub>3</sub>@PDA and g-C<sub>3</sub>N<sub>4</sub> from 50/1 to 1/2, (b) XRD patterns of Fe/Fe<sub>3</sub>C@FeNC obtained by different pyrolysis durations from 0.5 h to 3 h.

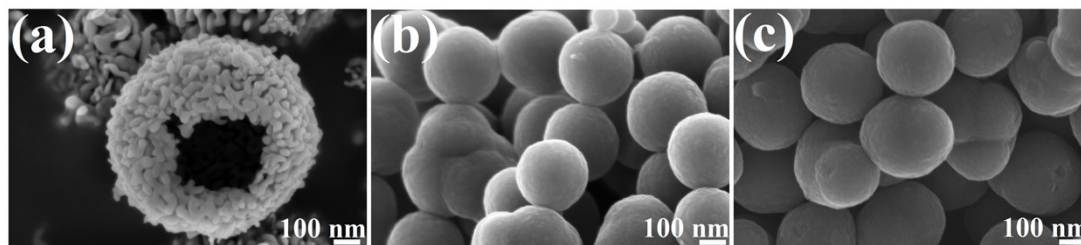

Fig. S2. SEM images of (a) Fe<sub>2</sub>O<sub>3</sub>, (b) NC-P, (c) NC

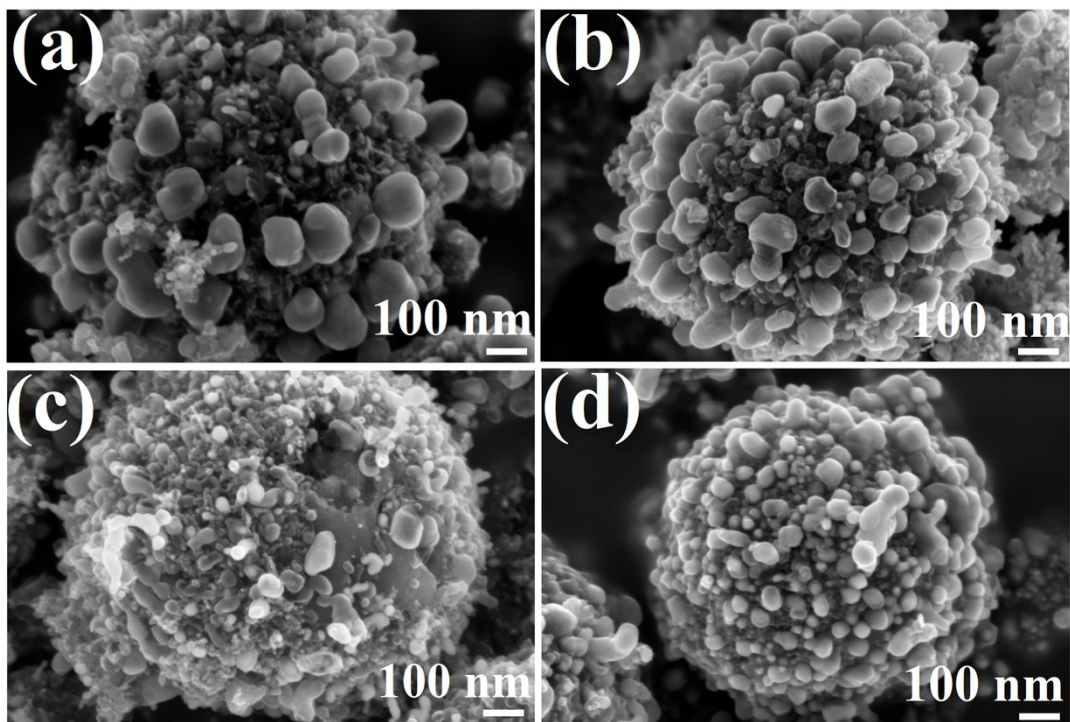

Fig. S3. SEM images of (a) Fe/Fe<sub>3</sub>C@FeNC-0.5, (b) Fe/Fe<sub>3</sub>C@FeNC-1, (c) Fe/Fe<sub>3</sub>C@FeNC-2, (d) Fe/Fe<sub>3</sub>C@FeNC-3.

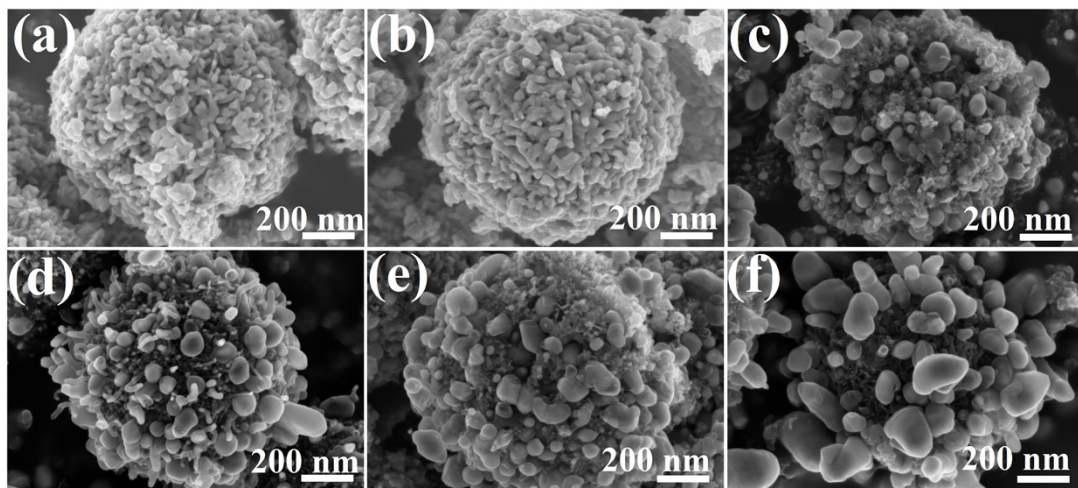

Fig. S4. SEM images of (a) Fe/Fe<sub>3</sub>C@FeNC-50/1, (b) Fe/Fe<sub>3</sub>C@FeNC-20/1, (c) Fe/Fe<sub>3</sub>C@FeNC-10/1, (d) Fe/Fe<sub>3</sub>C@FeNC, (e) Fe/Fe<sub>3</sub>C@FeNC-1/1.5, (f) Fe/Fe<sub>3</sub>C@FeNC-1/2.

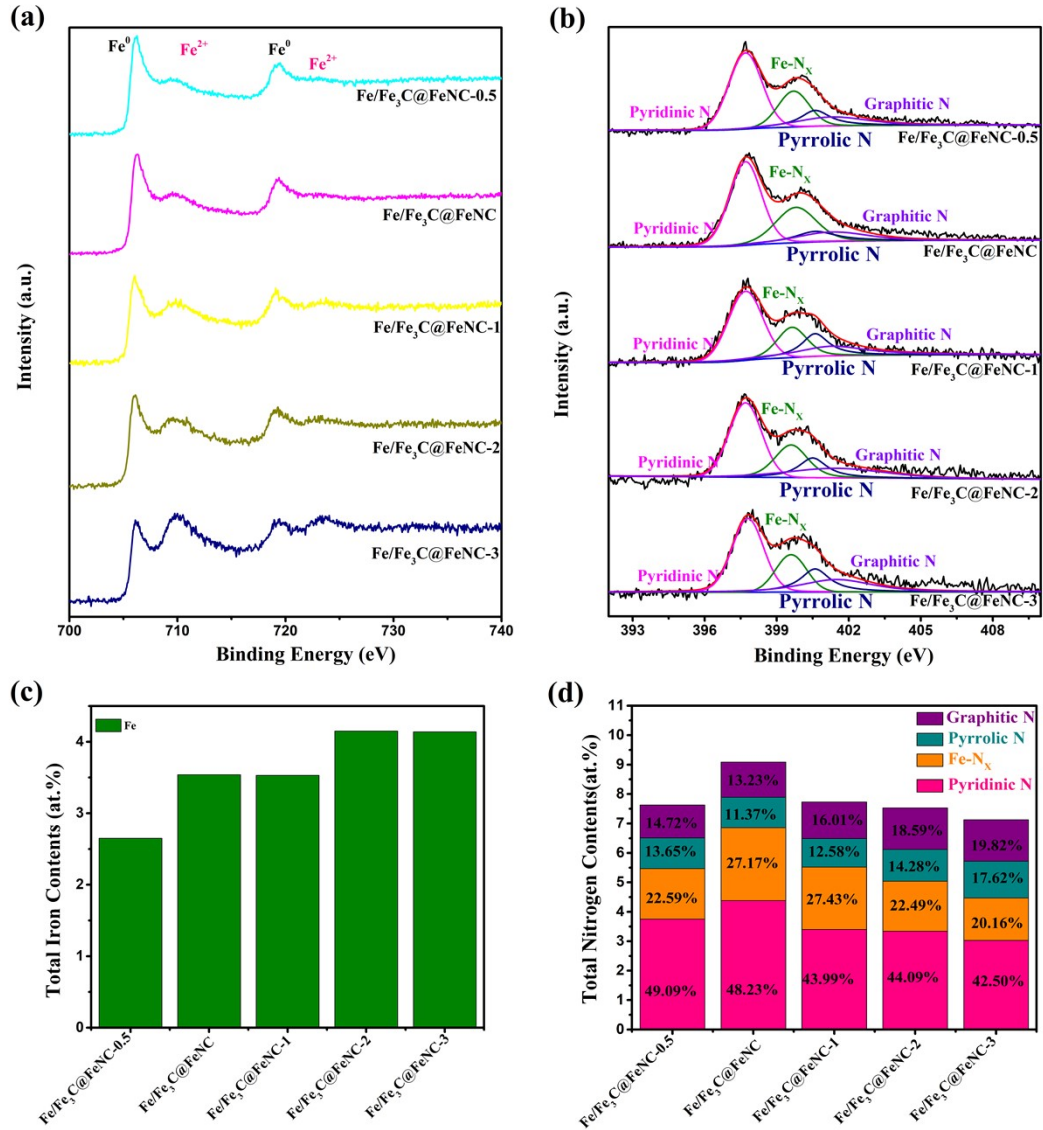

Fig. S5. (a) High-resolution Fe 2p spectrum and (b) high-resolution N 1s spectrum for different pyrolysis durations from 0.5 h to 3 h, (c) The contents of Fe and (d) the contents of total and function N for different pyrolysis durations from 0.5 h to 3 h according to XPS.

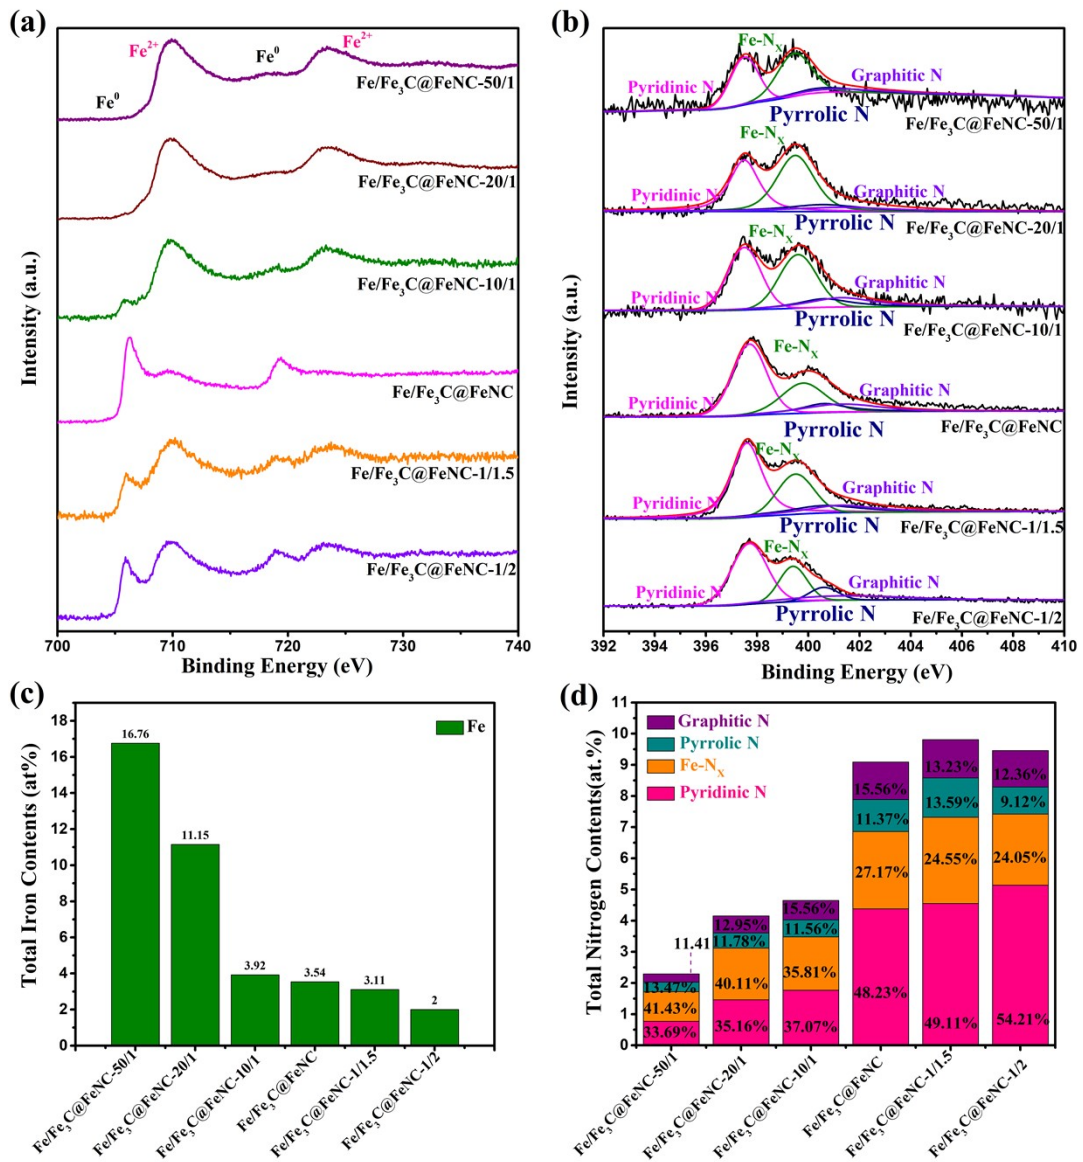

Fig. S6. (a) High-resolution Fe 2p spectrum and (b) high-resolution N 1s spectrum different mass ratios of Fe<sub>2</sub>O<sub>3</sub>@PDA and g-C<sub>3</sub>N<sub>4</sub> from 50/1 to 1/2, (c) The contents of Fe (d) the contents of total and function N for different mass ratios of Fe<sub>2</sub>O<sub>3</sub>@PDA and g-C<sub>3</sub>N<sub>4</sub> from 50/1 to 1/2 according to XPS.

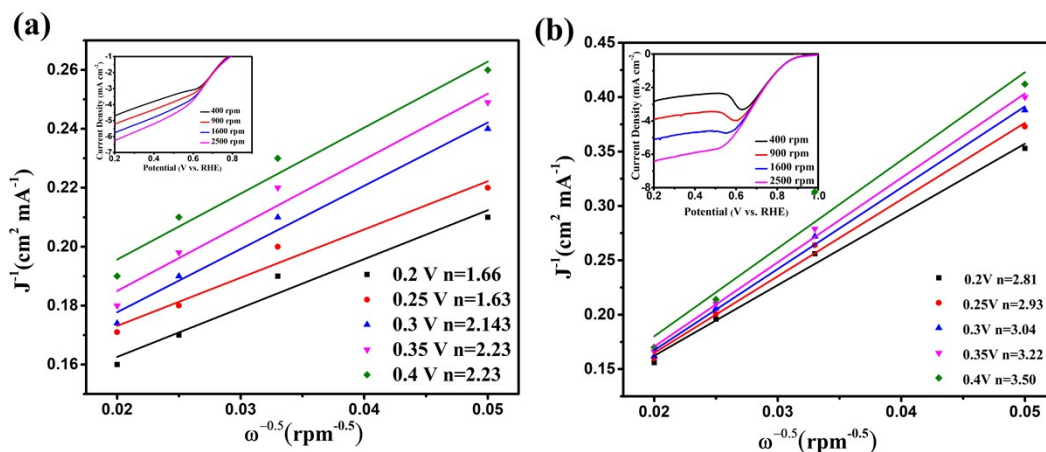

Fig. S7. K-L plots and electron transfer number at various potential of (a) NC, (b)

Fe/Fe<sub>3</sub>C@FeNC-nP-1/1.

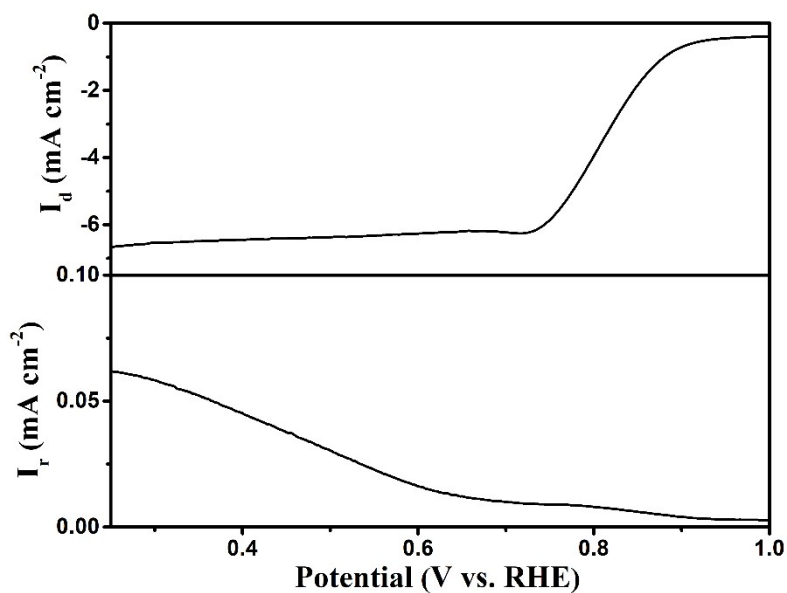

Fig. S8. RRDE voltammograms recorded with Fe/Fe<sub>3</sub>C@FeNC in O<sub>2</sub>-saturated 0.1 M KOH solution.

Scan rate: 10 mV s<sup>-1</sup> rotation rate 1600 rpm.

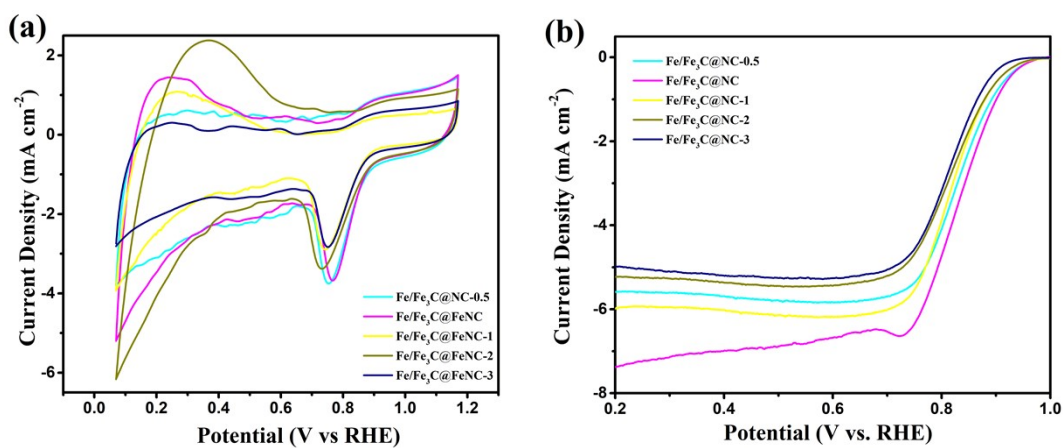

Fig. S9. (a) The CV curves, (b) LSV curves of different pyrolysis durations from 0.5 h to 3 h.

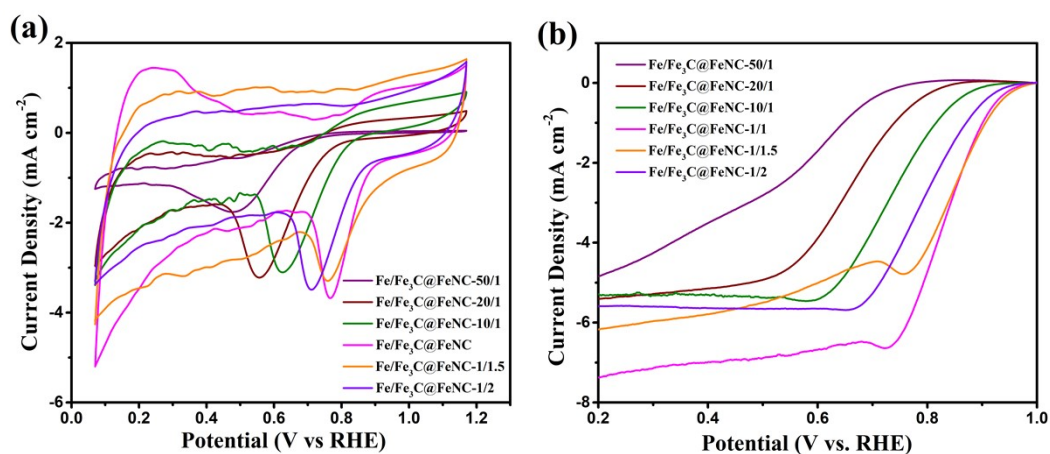

Fig. S10. (a) The CV curves, (b) LSV curves of different mass ratios of  $\text{Fe}_2\text{O}_3$ @PDA and  $\text{g-C}_3\text{N}_4$  from 50/1 to 1/2.

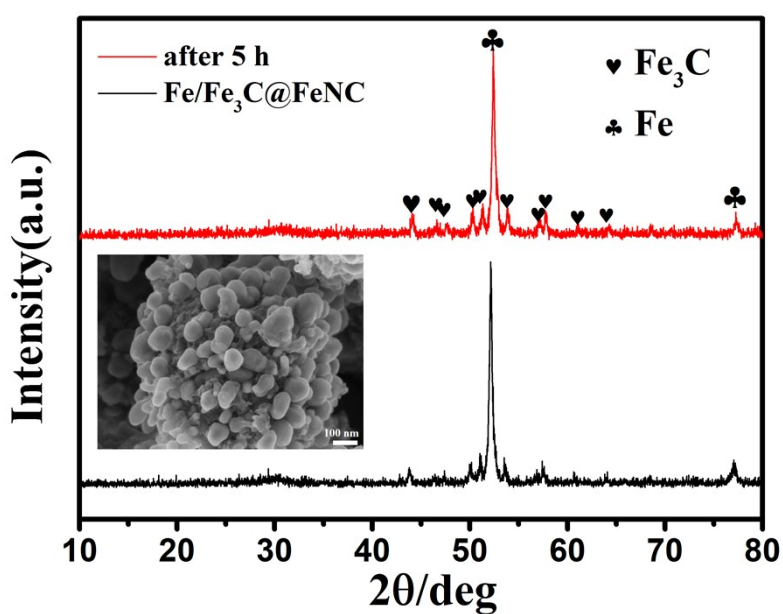

Fig. S11. XRD patterns of different  $\text{FeFe}_3\text{C@FeNC}$  and after 5 h cycle, and SEM image of after 5 h cycle

(inset).

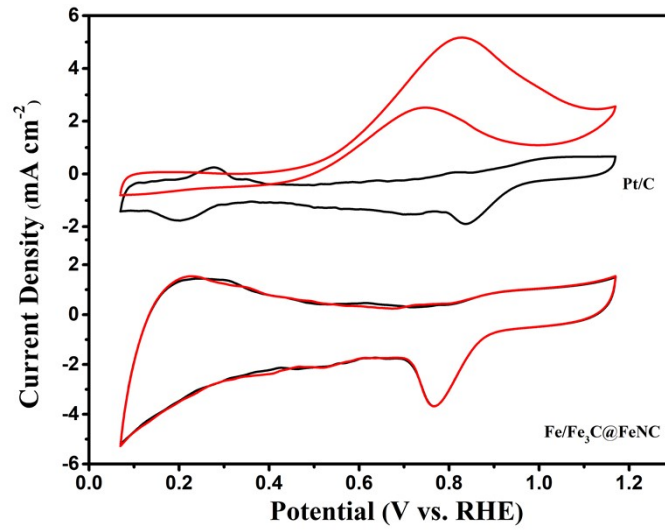

Fig. S12. Methanol tolerance tests of Fe/Fe<sub>3</sub>C@FeNC and commercial Pt/C.

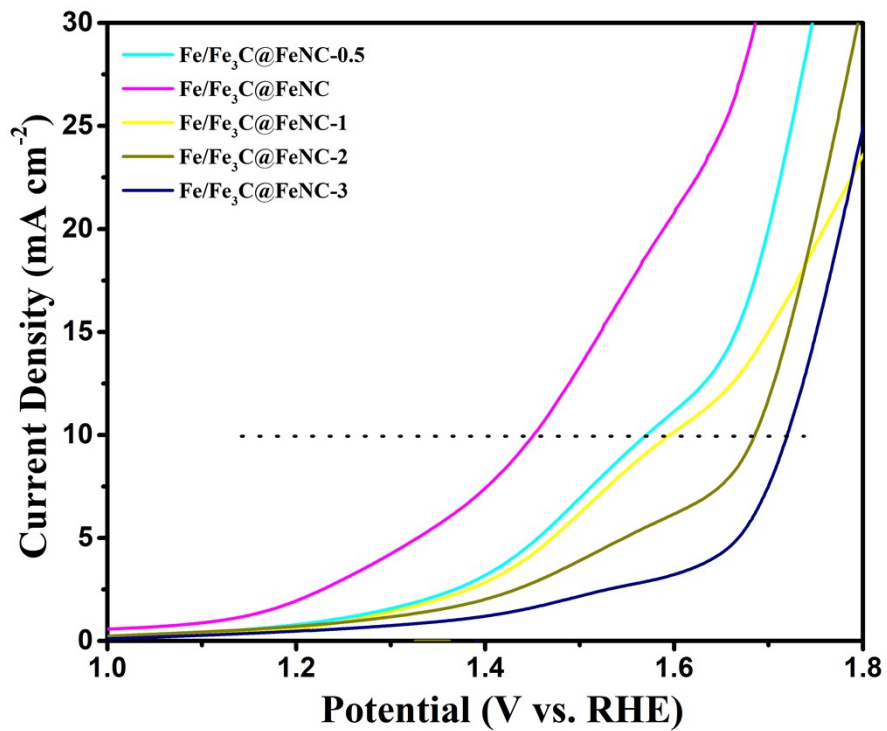

Fig. S13. LSV curves of different pyrolysis durations from 0.5 h to 3 h.

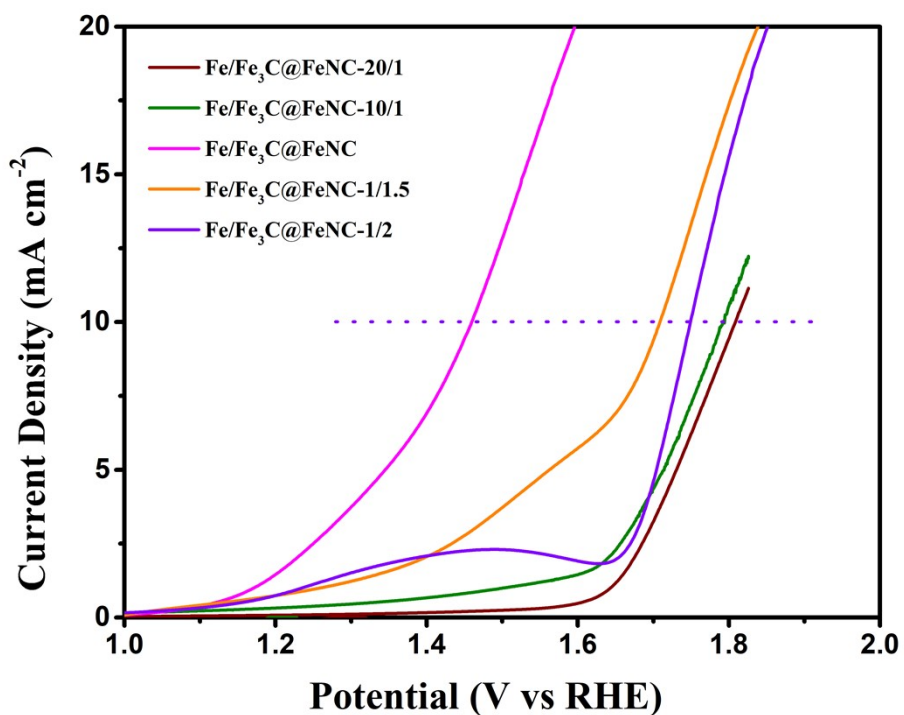

Fig. S14. LSV curves of different mass ratios of  $\text{Fe}_2\text{O}_3@PDA$  and  $g\text{-C}_3\text{N}_4$  from 20/1 to 1/2.

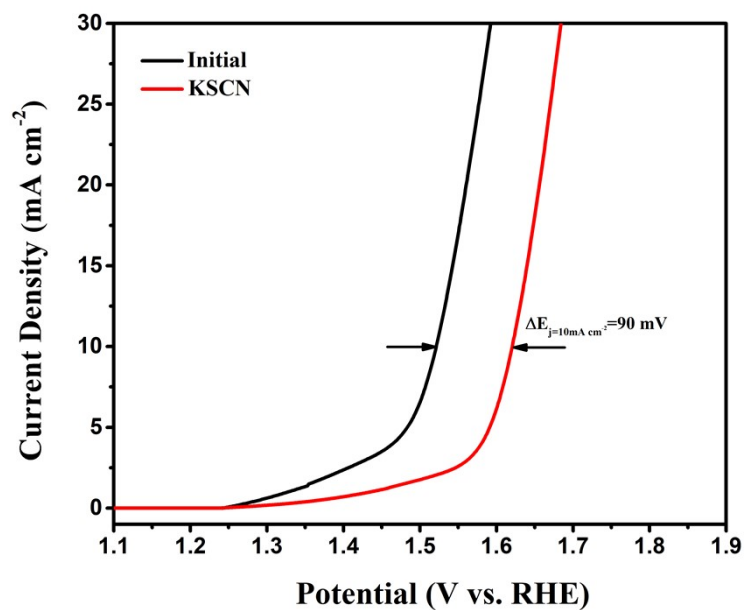

Fig. S15. LSV curves of  $\text{SCN}^{-1}$  poisoned and initial  $\text{Fe/Fe}_3\text{C@FeNC}$ .



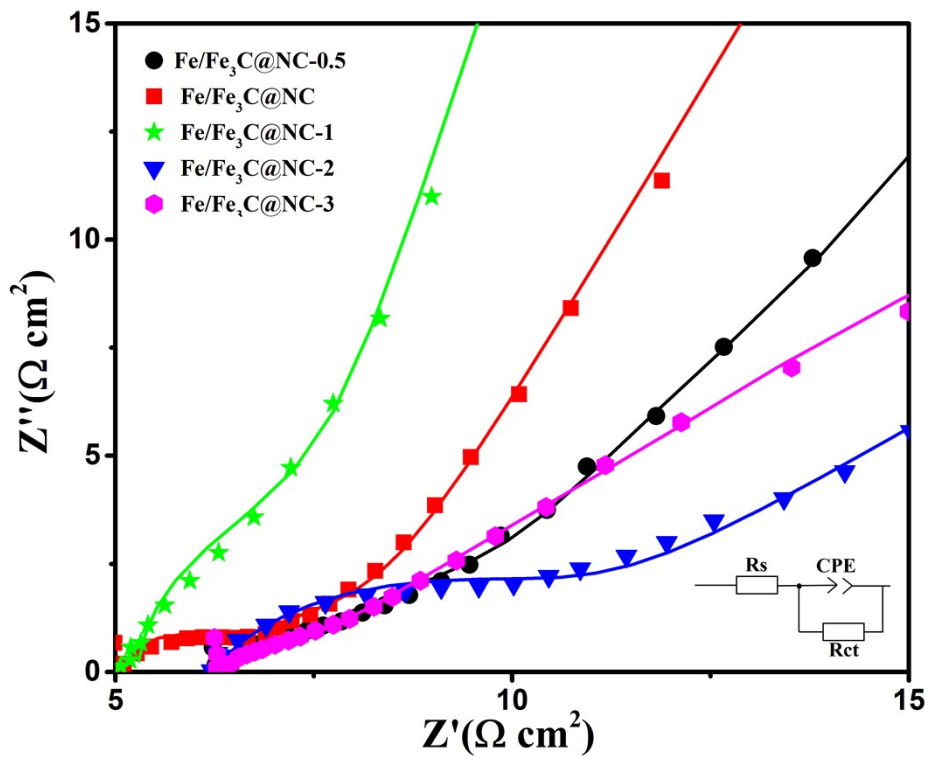

Fig. S16. Nyquist plots of the different pyrolysis durations from 0.5 h to 3 h.

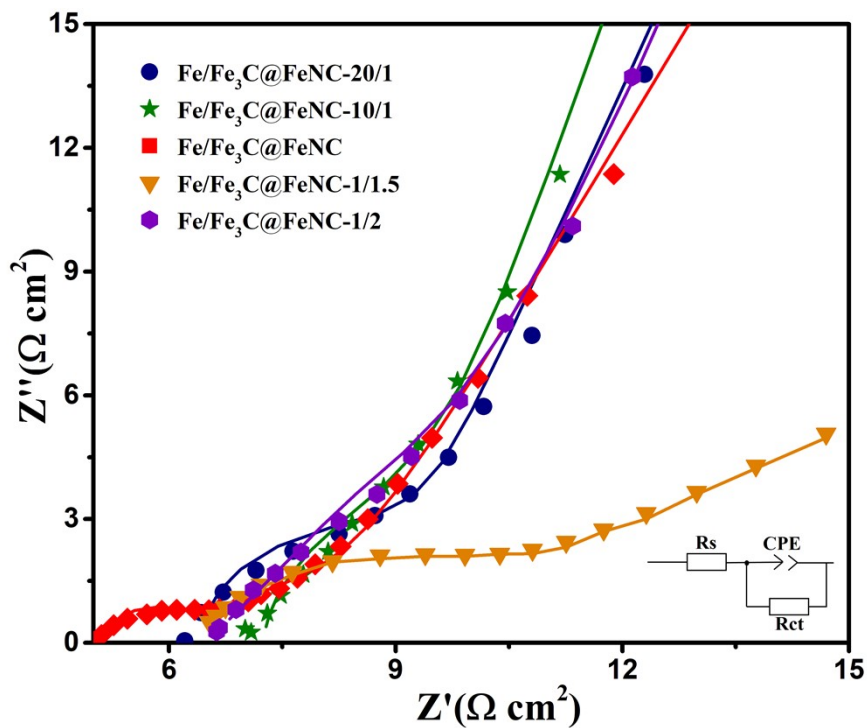

Fig. S17. Nyquist plots of the different mass ratios of  $\text{Fe}_2\text{O}_3$ @PDA and  $\text{g-C}_3\text{N}_4$  from 20/1 to 1/2.

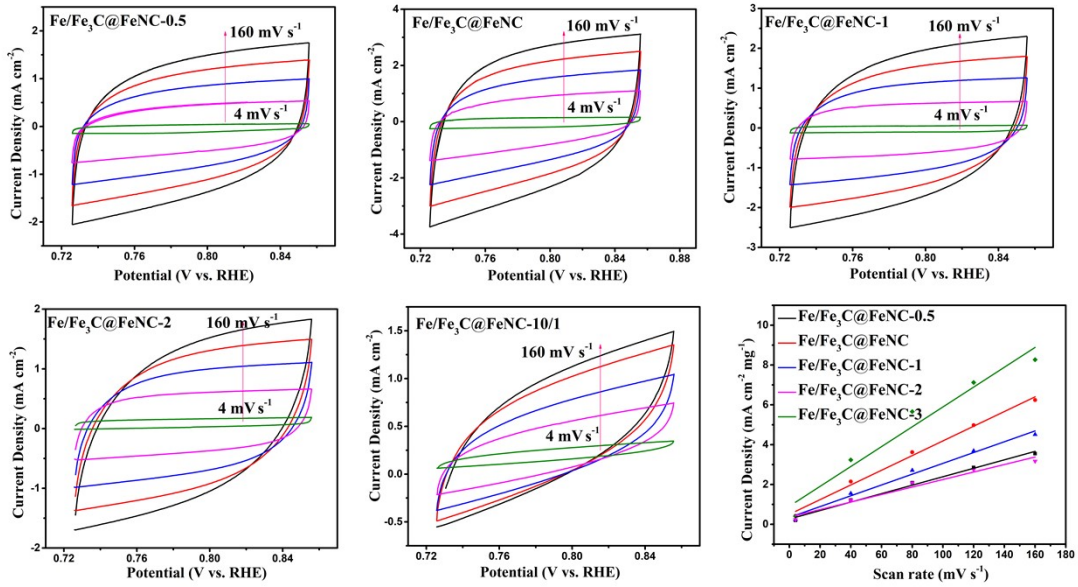

Fig. S18. (a-e) CV curves at different scan rates for different pyrolysis durations from 0.5 h to 3 h.

(f) Dependence of current density on scan rate.

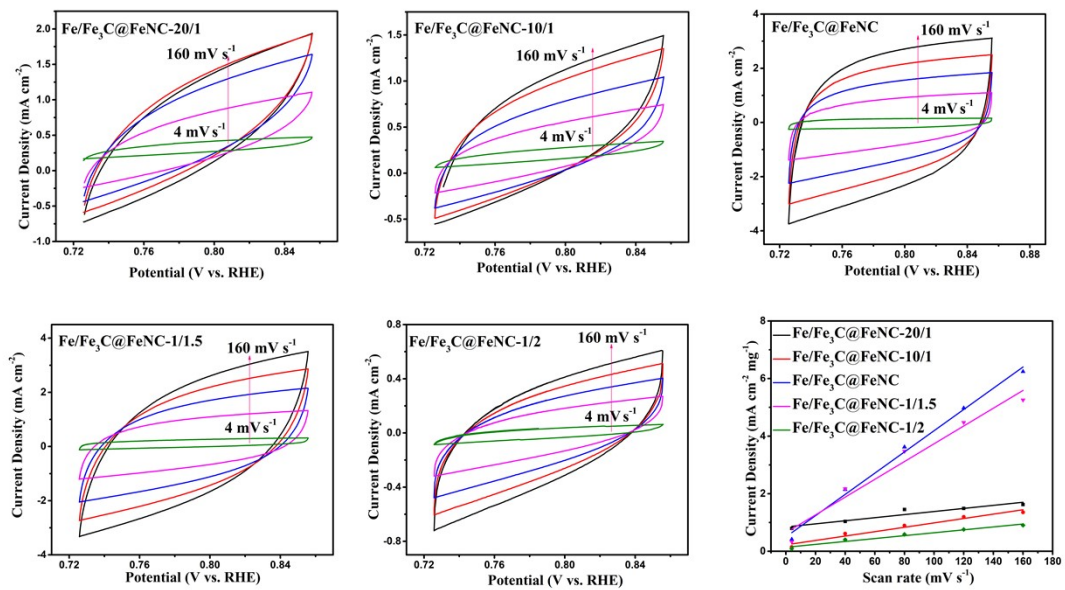

Fig. S19. (a-e) CV curves at different scan rates for different mass ratios of Fe<sub>2</sub>O<sub>3</sub>@PDA and g-C<sub>3</sub>N<sub>4</sub> from 20/1 to 1/2. (f) Dependence of current density on scan rate.

Table S1. ORR and OER performance of Fe/Fe<sub>3</sub>C@FeNC in this work and some other Fe-N-C electrocatalysts.

| Electrocatalyst                                        | ORR           |                              |                                   | OER                                       | $\Delta E$<br>(mV) | Reference |
|--------------------------------------------------------|---------------|------------------------------|-----------------------------------|-------------------------------------------|--------------------|-----------|
|                                                        | $E_{1/2}$ (V) | $j_L$ (mA cm <sup>-2</sup> ) | Stability retention rate (%)/Time | $\eta$ (mV) at $j=10$ mA cm <sup>-2</sup> |                    |           |
| Fe/Fe <sub>3</sub> C@FeNC                              | 0.832         | 7.7                          | 94/18000                          | 220                                       | 610                | This work |
| Co-Fe-P-Se/NC                                          | 0.76          | -                            | 60.4/7200                         | 270                                       | 740                | [2]       |
| FePPc@CB                                               | 0.908         | 7.44                         | 73/40000                          | 388                                       | 680                | [3]       |
| Fe <sub>3</sub> O <sub>4</sub> @FeNC                   | 0.890         | 6.9                          | 90/40000                          | -                                         | -                  | [4]       |
| Fe@C-NG/NCNTs                                          | 0.840         | -                            | 78.4/40000                        | 450                                       | 840                | [5]       |
| N-Co <sub>3</sub> O <sub>4</sub> @NC-2                 | 0.77          | 5.87                         | 97.6/15000                        | 320                                       | 780                | [6]       |
| Fe <sub>3</sub> O <sub>4</sub> /N-MCS-2                | 0.702         | 5.16                         | 91.6/80000                        | -                                         | -                  | [7]       |
| Fe <sub>3</sub> C/Fe <sub>2</sub> O <sub>3</sub> @NGNs | 0.82          | 5.64                         | 99.17/15000                       | 460                                       | 868                | [8]       |
| FeS/Fe <sub>3</sub> C@NS-C-900                         | 0.78          | 6.83                         | 90/20000                          | 270                                       | 720                | [9]       |
| Fe-N-DSC                                               | 0.739         | -                            | 95.9/30000                        | -                                         | -                  | [10]      |
| Co <sub>2</sub> P@NPC-1                                | 0.828         | 5.117                        | 88/20000                          | 327                                       | 729                | [11]      |

Table S2. Elemental values of fitted equivalent circuit based on EIS spectra for OER.

| Catalyst                        | $R_{ct}$ ( $\Omega \cdot \text{cm}^2$ ) | $R_s$ ( $\Omega \cdot \text{cm}^2$ ) | $CPE-T$ ( $\Omega^{-1} \cdot \text{cm}^{-2} \cdot \text{s}^{-n}$ ) | $CPE-P$ |
|---------------------------------|-----------------------------------------|--------------------------------------|--------------------------------------------------------------------|---------|
| Fe/Fe <sub>3</sub> C@FeNC-0.5   | 1.18                                    | 6.01                                 | 0.00015                                                            | 0.88    |
| Fe/Fe <sub>3</sub> C@FeNC       | 0.61                                    | 5.23                                 | 1.84E-6                                                            | 0.87    |
| Fe/Fe <sub>3</sub> C@FeNC-1     | 1.67                                    | 5.45                                 | 6.74E-6                                                            | 0.88    |
| Fe/Fe <sub>3</sub> C@FeNC-2     | 3.79                                    | 6.20                                 | 6.24E-5                                                            | 0.86    |
| Fe/Fe <sub>3</sub> C@FeNC-3     | 0.56                                    | 6.32                                 | 5.04E-6                                                            | 0.87    |
| Fe/Fe <sub>3</sub> C@FeNC-20/1  | 2.22                                    | 6.18                                 | 1.02E-6                                                            | 0.88    |
| Fe/Fe <sub>3</sub> C@FeNC-10/1  | 1.52                                    | 6.21                                 | 8.66E-6                                                            | 0.89    |
| Fe/Fe <sub>3</sub> C@FeNC-1.5/1 | 9.67                                    | 6.25                                 | 0.00040                                                            | 0.86    |
| Fe/Fe <sub>3</sub> C@FeNC-1/2   | 87.27                                   | 6.47                                 | 0.00014                                                            | 0.88    |

Table S3. The performance of ZABs by recently reported bifunctional electrocatalysts and Fe/Fe<sub>3</sub>C@FeNC in this work.

| Electrocatalyst                                        | Open-circuit voltage (V) | Maximum power density (mW cm <sup>-2</sup> ) | Specific capacity (mAh g <sup>-1</sup> ) | Energy density (Wh kg <sup>-1</sup> ) | Reference |
|--------------------------------------------------------|--------------------------|----------------------------------------------|------------------------------------------|---------------------------------------|-----------|
| Fe/Fe <sub>3</sub> C@FeNC                              | <b>1.414</b>             | <b>134.6</b>                                 | <b>856.2</b>                             | <b>1094</b>                           | This work |
| FeNi-N-C/N- CNT                                        | 1.46                     | 273                                          | 755                                      | 924                                   | [12]      |
| Fe <sub>3</sub> O <sub>4</sub> @NHCS-2                 | 1.42                     | 133                                          | 701                                      | -                                     | [13]      |
| Fe <sub>2</sub> O <sub>3</sub> @NC-450                 | 1.267                    | 156.6                                        | -                                        | -                                     | [14]      |
| Fe <sub>3</sub> C/Fe <sub>2</sub> O <sub>3</sub> @NGNs | 1.46                     | 139.8                                        | 722                                      | 805                                   | [8]       |
| Co-Fe-P-Se/NC                                          | 1.3                      | 104                                          | 708                                      | 805                                   | [2]       |
| FePPc@CB                                               | 1.367                    | 90                                           | 1391                                     | 1317                                  | [3]       |
| FeS/Fe <sub>3</sub> C@NS-C-900                         | 1.455                    | 192.2                                        | 750                                      | -                                     | [9]       |
| FeNi <sub>3</sub> @NC                                  | 1.14                     | 139                                          | 756                                      | 915                                   | [15]      |
| nNiFe LDH/3D MPC                                       | 1.51                     | 97                                           | 573                                      | -                                     | [16]      |
| Co/Co-N-C                                              | 1.434                    | 122.5                                        | 700.6                                    | 897.1                                 | [17]      |

## References

- [1] Y.J. Deng, B. Chi, X.L. Tian, Z.M. Cui, E.S. Liu, Q.Y. Jia, et al. g-C<sub>3</sub>N<sub>4</sub> promoted MOF derived hollow carbon nanopolyhedra doped with high density/fraction of single Fe atoms as an ultra-high performance non-precious catalyst towards acidic ORR and PEM fuel cells. *J Mater Chem A*. 7 (2019) 5020-30.
- [2] H.B. Wu, J. Wang, J. Yan, Z.X. Wu, W. Jin. MOF-derived two-dimensional N-doped carbon nanosheets coupled with Co-Fe-P-Se as efficient bifunctional OER/ORR catalysts. *Nanoscale*. 11 (2019) 20144-50.
- [3] W.Z. Cheng, J.L. Liang, H.B. Yin, Y.J. Wang, W.F. Yan, J.N. Zhang. Bifunctional iron-phtalocyanine metal-organic framework catalyst for ORR, OER and rechargeable zinc-air battery. *Rare Metals*. 39 (2020) 815-23.
- [4] S.Q. Hu, W.P. Ni, D.H. Yang, C. Ma, J.H. Zhang, J.F. Duan, et al. Fe<sub>3</sub>O<sub>4</sub> nanoparticles encapsulated in single-atom Fe-N-C towards efficient oxygen reduction reaction: Effect of the micro and macro pores. *Carbon*. 162 (2020) 245-55.
- [5] Q.C. Wang, Y.P. Lei, Z.Y. Chen, N. Wu, Y.B. Wang, B. Wang, et al. Fe/Fe<sub>3</sub>C@C nanoparticles

encapsulated in N-doped graphene-CNTs framework as an efficient bifunctional oxygen electrocatalyst for robust rechargeable Zn-air batteries. *J Mater Chem A*. 6 (2018) 516-26.

[6] Z.C. Wang, W.J. Xu, X.K. Chen, Y.H. Peng, Y.Y. Song, C.X. Lv, et al. Defect-Rich Nitrogen Doped Co<sub>3</sub>O<sub>4</sub>/C Porous Nanocubes Enable High-Efficiency Bifunctional Oxygen Electrocatalysis. *Adv Funct Mater*. 29 (2019) 11.

[7] H.T. Wang, W. Wang, M.X. Gui, M. Asif, Z.Y. Wang, Y. Yu, et al. Uniform Fe<sub>3</sub>O<sub>4</sub>/Nitrogen-Doped Mesoporous Carbon Spheres Derived from Ferric Citrate-Bonded Melamine Resin as an Efficient Synergistic Catalyst for Oxygen Reduction. *ACS Appl Mater Interfaces*. 9 (2017) 335-44.

[8] Y.H. Tian, L. Xu, J.C. Qian, J. Bao, C. Yan, H.N. Li, et al. Fe<sub>3</sub>C/Fe<sub>2</sub>O<sub>3</sub> heterostructure embedded in N-doped graphene as a bifunctional catalyst for quasi-solid-state zinc-air batteries. *Carbon*. 146 (2019) 763-71.

[9] Y.W. Li, W.J. Zhang, J. Li, H.Y. Ma, H.M. Du, D.C. Li, et al. Fe-MOF-Derived Efficient ORR/OER Bifunctional Electrocatalyst for Rechargeable Zinc-Air Batteries. *ACS Appl Mater Interfaces*. 12 (2020) 44710-9.

[10] Z. Huang, H.Y. Pan, W.J. Yang, H.H. Zhou, N. Gao, C.P. Fu, et al. In Situ Self-Template Synthesis of Fe-N-Doped Double-Shelled Hollow Carbon Microspheres for Oxygen Reduction Reaction. *ACS Nano*. 12 (2018) 208-16.

[11] J. Li, G.Y. Liu, B.B. Liu, Z.Y. Min, D. Qian, J.B. Jiang, et al. An extremely facile route to Co<sub>2</sub>P encased in N,P-codoped carbon layers: Highly efficient bifunctional electrocatalysts for ORR and OER. *Int J Hydrog Energy*. 43 (2018) 1365-74.

[12] J.J. Fang, X.J. Zhang, X.D. Wang, D. Liu, Y.R. Xue, Z.Y. Xu, et al. A metal and nitrogen doped carbon composite with both oxygen reduction and evolution active sites for rechargeable zinc-air batteries. *J Mater Chem A*. 8 (2020) 15752-9.

[13] Y.Q. Li, H.Y. Huang, S.R. Chen, X. Yu, C. Wang, T.L. Ma. 2D nanoplate assembled nitrogen doped hollow carbon sphere decorated with Fe<sub>3</sub>O<sub>4</sub> as an efficient electrocatalyst for oxygen reduction reaction and Zn-air batteries. *Nano Res*. 12 (2019) 2774-80.

[14] Z.R. Xiao, C. Wu, W. Wang, L. Pan, J.J. Zou, L. Wang, et al. Tailoring the hetero-structure of iron oxides in the framework of nitrogen doped carbon for the oxygen reduction reaction and zinc-air batteries. *J Mater Chem A*. 8 (2020) 25791-804.

[15] D. Chen, J.W. Zhu, X.Q. Mu, R.L. Cheng, W.Q. Li, S.L. Liu, et al. Nitrogen-Doped carbon coupled

FeNi<sub>3</sub> intermetallic compound as advanced bifunctional electrocatalyst for OER, ORR and zn-air batteries. *Appl Catal B-Environ.* 268 (2020) 9.

[16] W. Wang, Y.C. Liu, J. Li, J. Luo, L. Fu, S.L. Chen. NiFe LDH nanodots anchored on 3D macro/mesoporous carbon as a high-performance ORR/OER bifunctional electrocatalyst. *J Mater Chem A.* 6 (2018) 14299-306.

[17] D. Wang, P.X. Yang, H. Xu, J.Y. Ma, L. Du, G.X. Zhang, et al. The dual-nitrogen-source strategy to modulate a bifunctional hybrid Co/Co-N-C catalyst in the reversible air cathode for Zn-air batteries. *J Power Sources.* 485 (2021) 10.
